# Supplementary material for: Prediction of P53 Mutants (Multiple Sites) Transcriptional Activity Based on Structural (2D&3D) Properties
Source: PLoS One. 2013 Feb 13;8(2):e55401. doi: 10.1371/journal.pone.0055401 (PMC3572112; doi:10.1371/journal.pone.0055401)
Supplement: Table S3 — Incremental Feature Selection Results of site-specific p53 mutant data. (XLS) [file pone.0055401.s003.xls]

## Sheet: Site-1
Attribute Evaluator: CFS Subset Evaluator
Prediction Algorithm: Adaboost (Decision Stump) Learning
Number of filtered features :11
S.No	Feature ID	Feature	Type	MCC
1	V59	Distance2814_THR_123	2D	0.239
2	V524	Distance2153_PRO_153	2D	0.291
3	V1495	Distance5306_SER_99	2D	0.115
4	V1639	Distance3492_TYR_103	2D	0.239
5	V2369	Distance2383_ARG_156	2D	0.362
6	V3049	PhiElectrostatic4366_ALA_129	2D	0.569
7	V3746	PhiElectrostatic4955_ASN_268	2D	0.775
8	V3869	PhiElectrostatic4818_SER_99	2D	0.775
9	V4453	PhiElectrostatic3729_LEU_264	2D	0.775
10	V4460	PhiElectrostatic3853_LEU_264	2D	0.661
11	V4916	aa125Z	3D	0.616
		Optimal Number of Features :7

## Sheet: Site-2
Attribute Evaluator: CFS Subset Evaluator
Prediction Algorithm: Random Committee (Random Tree) Learning
Number of filtered features :52
S.No	Feature ID	Feature	Type	MCC
1	V55	Distance2696_THR_123	2D	0.046
2	V66	Distance2935_THR_123	2D	0.111
3	V80	Distance3179_THR_123	2D	0.065
4	V84	Distance3300_THR_123	2D	0.067
5	V359	Distance2820_LYS_139	2D	0.067
6	V404	Distance2465_ALA_138	2D	0.105
7	V410	Distance2707_ALA_138	2D	0.089
8	V449	Distance_LEU_206	2D	0.131
9	V541	Distance2277_PRO_152	2D	0.172
10	V844	Distance3671_GLN_136	2D	0.12
11	V877	Distance4517_ALA_276	2D	0.187
12	V881	Distance4638_ALA_276	2D	0.139
13	V918	Distance5074_SER_269	2D	0.15
14	V1113	Distance3792_LEU_137	2D	0.181
15	V1151	Distance4156_LEU_137	2D	0.159
16	V1152	Distance4157_LEU_137	2D	0.204
17	V1155	Distance4160_LEU_137	2D	0.159
18	V1160	Distance4278_LEU_137	2D	0.14
19	V1161	Distance4279_LEU_137	2D	0.19
20	V1354	Distance2812_CYS_124	2D	0.152
21	V1363	Distance3724_MET_160	2D	0.23
22	V1559	Distance2282_TYR_107	2D	0.239
23	V1841	Distance5549_GLN_100	2D	0.239
24	V1860	Distance5800_GLN_100	2D	0.233
25	V2181	Distance_TYR_239	2D	0.199
26	V2219	Distance3299_VAL_122	2D	0.208
27	V2291	Distance2699_THR_140	2D	0.176
28	V2321	Distance3476_ARG_158	2D	0.208
29	V2399	Distance_SER_166	2D	0.19
30	V2596	PhiElectrostatic5173_VAL_97	2D	0.131
31	V2824	PhiElectrostatic2708_ALA_138	2D	0.113
32	V2929	PhiElectrostatic1911_PRO_153	2D	0.211
33	V3262	PhiElectrostatic3910_GLN_136	2D	0.159
34	V3292	PhiElectrostatic4637_ALA_276	2D	0.166
35	V3293	PhiElectrostatic4638_ALA_276	2D	0.25
36	V3363	PhiElectrostatic_SER_261	2D	0.199
37	V3525	PhiElectrostatic3792_LEU_137	2D	0.272
38	V3714	PhiElectrostatic3255_GLY_105	2D	0.282
39	V3907	PhiElectrostatic5307_SER_99	2D	0.239
40	V3986	PhiElectrostatic2645_TYR_107	2D	0.292
41	V4084	PhiElectrostatic4274_CYS_277	2D	0.247
42	V4231	PhiElectrostatic5309_GLN_100	2D	0.247
43	V4241	PhiElectrostatic5430_GLN_100	2D	0.159
44	V4254	PhiElectrostatic5554_GLN_100	2D	0.199
45	V4503	PhiElectrostatic2042_THR_150	2D	0.176
46	V4748	PhiElectrostatic3717_ARG_158	2D	0.279
47	V4910	aa123Z	3D	0.239
48	V4995	aa152X	3D	0.28
49	V5185	aa215Y	3D	0.199
50	V5245	aa235Y	3D	0.272
51	V5258	aa239Z	3D	0.267
52	V5366	aa275Z	3D	0.341
		Optimal Number of Features :52

## Sheet: Site-3
Attribute Evaluator: CFS Subset Evaluator
Prediction Algorithm:Bayesian Network Learning
Number of filtered features :35
S.No	Feature ID	Feature	Type	MCC
1	V85	Distance3301_THR_123	2D	0.378
2	V162	Distance1787_GLY_154	2D	0.493
3	V370	Distance2945_LYS_139	2D	0.57
4	V371	Distance2946_LYS_139	2D	0.584
5	V527	Distance2036_PRO_152	2D	0.601
6	V550	Distance1676_PRO_151	2D	0.601
7	V718	Distance4268_LYS_120	2D	0.575
8	V882	Distance4755_ALA_276	2D	0.522
9	V1379	Distance4080_MET_160	2D	0.614
10	V1562	Distance2401_TYR_107	2D	0.65
11	V1622	Distance3284_HID_115	2D	0.635
12	V1704	Distance5237_CYS_273	2D	0.666
13	V1710	Distance5356_CYS_273	2D	0.666
14	V1747	Distance3260_GLN_104	2D	0.666
15	V2096	Distance2045_THR_150	2D	0.666
16	V2263	Distance2215_THR_140	2D	0.666
17	V2284	Distance2458_THR_140	2D	0.599
18	V2671	PhiElectrostatic4263_ARG_283	2D	0.656
19	V2707	PhiElectrostatic4630_ARG_280	2D	0.656
20	V2713	PhiElectrostatic4751_ARG_280	2D	0.63
21	V2909	PhiElectrostatic3786_SER_121	2D	0.63
22	V3010	PhiElectrostatic4601_ASN_131	2D	0.63
23	V3162	PhiElectrostatic4578_ARG_267	2D	0.63
24	V3297	PhiElectrostatic4758_ALA_276	2D	0.718
25	V3568	PhiElectrostatic4161_LEU_137	2D	0.734
26	V4061	PhiElectrostatic3735_TYR_103	2D	0.734
27	V4099	PhiElectrostatic5115_CYS_275	2D	0.734
28	V4123	PhiElectrostatic5471_CYS_273	2D	0.75
29	V4459	PhiElectrostatic3852_LEU_264	2D	0.767
30	V4620	PhiElectrostatic3055_VAL_122	2D	0.784
31	V5068	aa176Y	3D	0.765
32	V5249	aa236Z	3D	0.765
33	V5250	aa237X	3D	0.767
34	V5282	aa247Z	3D	0.764
35	V5383	aa281Y	3D	0.745
		Optimal Number of Features :30

## Sheet: Site-4
Attribute Evaluator: CFS Subset Evaluator
Prediction Algorithm:Bayesian Network Learning
Number of filtered features :16
S.No	Feature ID	Feature	Type	MCC
1	V376	Distance3067_LYS_139	2D	0.712
2	V383	Distance3188_LYS_139	2D	0.712
3	V413	Distance2828_ALA_138	2D	0.631
4	V427	Distance3074_ALA_138	2D	0.631
5	V438	Distance3315_ALA_138	2D	0.631
6	V715	Distance4265_LYS_120	2D	0.631
7	V799	Distance2326_PRO_142	2D	0.631
8	V1099	Distance_ARG_249	2D	0.631
9	V1137	Distance4034_LEU_137	2D	0.739
10	V2115	Distance5113_ASP_281	2D	0.674
11	V2789	PhiElectrostatic3067_LYS_139	2D	0.631
12	V2840	PhiElectrostatic3074_ALA_138	2D	0.815
13	V3521	PhiElectrostatic3676_LEU_137	2D	0.815
14	V4677	PhiElectrostatic2218_THR_140	2D	0.907
15	V4953	aa138X	3D	0.916
16	V5274	aa245X	3D	0.907
		Optimal Number of Features :15

## Sheet: Site-5
Attribute Evaluator: CFS Subset Evaluator
Prediction Algorithm: Random Committee (Random Tree)
Number of filtered features :154
S.No	Feature ID	Feature	Type	MCC
1	V109	Distance_LEU_188	2D	0.655
2	V133	Distance_TYR_205	2D	0.655
3	V137	Distance_HID_178	2D	0.655
4	V148	Distance3772_THR_118	2D	0.655
5	V169	Distance_GLN_167	2D	0.655
6	V172	Distance_CYZ_176	2D	0.655
7	V319	Distance3983_THR_102	2D	0.655
8	V325	Distance4104_THR_102	2D	0.655
9	V327	Distance4106_THR_102	2D	0.655
10	V328	Distance4107_THR_102	2D	0.655
11	V356	Distance2584_LYS_139	2D	0.655
12	V371	Distance2946_LYS_139	2D	0.655
13	V405	Distance2585_ALA_138	2D	0.655
14	V409	Distance2706_ALA_138	2D	0.655
15	V412	Distance2827_ALA_138	2D	0.655
16	V413	Distance2828_ALA_138	2D	0.655
17	V416	Distance2947_ALA_138	2D	0.655
18	V417	Distance2948_ALA_138	2D	0.655
19	V418	Distance2949_ALA_138	2D	0.655
20	V421	Distance2952_ALA_138	2D	0.655
21	V430	Distance3192_ALA_138	2D	0.655
22	V431	Distance3193_ALA_138	2D	0.655
23	V432	Distance3194_ALA_138	2D	0.655
24	V433	Distance3195_ALA_138	2D	0.655
25	V436	Distance3313_ALA_138	2D	0.655
26	V437	Distance3314_ALA_138	2D	0.655
27	V438	Distance3315_ALA_138	2D	0.655
28	V439	Distance3316_ALA_138	2D	0.655
29	V442	Distance3435_ALA_138	2D	0.655
30	V444	Distance3437_ALA_138	2D	0.655
31	V479	Distance3022_ARG_110	2D	0.655
32	V813	Distance_VAL_225	2D	0.655
33	V852	Distance3912_GLN_136	2D	0.655
34	V928	Distance2767_SER_106	2D	0.655
35	V930	Distance2769_SER_106	2D	0.655
36	V1027	Distance_ASP_207	2D	0.655
37	V1142	Distance4039_LEU_137	2D	0.655
38	V1143	Distance4040_LEU_137	2D	0.655
39	V1145	Distance4042_LEU_137	2D	0.655
40	V1391	Distance4202_MET_160	2D	0.655
41	V1398	Distance4209_MET_160	2D	0.655
42	V1409	Distance4330_MET_160	2D	0.655
43	V1433	Distance5098_LEU_289	2D	0.655
44	V1774	Distance3743_GLN_104	2D	0.655
45	V1880	Distance1836_LEU_114	2D	0.655
46	V2048	Distance3851_LEU_264	2D	0.655
47	V2226	Distance1614_THR_140	2D	0.655
48	V2252	Distance2092_THR_140	2D	0.655
49	V2324	Distance3479_ARG_158	2D	0.655
50	V2325	Distance3480_ARG_158	2D	0.655
51	V2478	PhiElectrostatic2818_THR_123	2D	0.655
52	V2492	PhiElectrostatic3061_THR_123	2D	0.655
53	V2497	PhiElectrostatic3181_THR_123	2D	0.655
54	V2498	PhiElectrostatic3182_THR_123	2D	0.655
55	V2552	PhiElectrostatic_HID_178	2D	0.655
56	V2699	PhiElectrostatic4506_ARG_280	2D	0.655
57	V2784	PhiElectrostatic2946_LYS_139	2D	0.655
58	V2790	PhiElectrostatic3068_LYS_139	2D	0.655
59	V2791	PhiElectrostatic3183_LYS_139	2D	0.655
60	V2795	PhiElectrostatic3187_LYS_139	2D	0.655
61	V2796	PhiElectrostatic3188_LYS_139	2D	0.655
62	V2808	PhiElectrostatic3430_LYS_139	2D	0.655
63	V2810	PhiElectrostatic3549_LYS_139	2D	0.655
64	V2817	PhiElectrostatic2465_ALA_138	2D	0.655
65	V2827	PhiElectrostatic2829_ALA_138	2D	0.655
66	V2927	PhiElectrostatic1909_PRO_153	2D	0.655
67	V2928	PhiElectrostatic1910_PRO_153	2D	0.655
68	V2935	PhiElectrostatic2030_PRO_153	2D	0.655
69	V2939	PhiElectrostatic2034_PRO_153	2D	0.655
70	V2974	PhiElectrostatic3757_ASN_131	2D	0.655
71	V3103	PhiElectrostatic_ASP_184	2D	0.655
72	V3169	PhiElectrostatic2686_SER_116	2D	0.655
73	V3170	PhiElectrostatic2687_SER_116	2D	0.655
74	V3173	PhiElectrostatic2808_SER_116	2D	0.655
75	V3225	PhiElectrostatic_VAL_225	2D	0.655
76	V3245	PhiElectrostatic3303_GLN_136	2D	0.655
77	V3246	PhiElectrostatic3304_GLN_136	2D	0.655
78	V3249	PhiElectrostatic3425_GLN_136	2D	0.655
79	V3254	PhiElectrostatic3667_GLN_136	2D	0.655
80	V3282	PhiElectrostatic4151_ALA_276	2D	0.655
81	V3346	PhiElectrostatic2887_SER_106	2D	0.655
82	V3357	PhiElectrostatic3130_SER_106	2D	0.655
83	V3365	PhiElectrostatic_SER_260	2D	0.655
84	V3504	PhiElectrostatic4694_PRO_98	2D	0.655
85	V3739	PhiElectrostatic4715_ASN_268	2D	0.655
86	V3809	PhiElectrostatic4209_MET_160	2D	0.655
87	V3841	PhiElectrostatic4978_LEU_289	2D	0.655
88	V3886	PhiElectrostatic5061_SER_99	2D	0.655
89	V3991	PhiElectrostatic_SER_240	2D	0.655
90	V3992	PhiElectrostatic_ARG_196	2D	0.655
91	V4034	PhiElectrostatic3287_HID_115	2D	0.655
92	V4036	PhiElectrostatic3008_TYR_103	2D	0.655
93	V4066	PhiElectrostatic3855_TYR_103	2D	0.655
94	V4136	PhiElectrostatic5600_CYS_273	2D	0.655
95	V4262	PhiElectrostatic5676_GLN_100	2D	0.655
96	V4266	PhiElectrostatic5797_GLN_100	2D	0.655
97	V4270	PhiElectrostatic5918_GLN_100	2D	0.655
98	V4281	PhiElectrostatic1591_LEU_114	2D	0.655
99	V4282	PhiElectrostatic1712_LEU_114	2D	0.655
100	V4283	PhiElectrostatic1714_LEU_114	2D	0.655
101	V4286	PhiElectrostatic1833_LEU_114	2D	0.655
102	V4287	PhiElectrostatic1834_LEU_114	2D	0.655
103	V4288	PhiElectrostatic1835_LEU_114	2D	0.655
104	V4289	PhiElectrostatic1836_LEU_114	2D	0.655
105	V4474	PhiElectrostatic_SER_185	2D	0.655
106	V4617	PhiElectrostatic3052_VAL_122	2D	0.655
107	V4677	PhiElectrostatic2218_THR_140	2D	0.655
108	V4687	PhiElectrostatic2339_THR_140	2D	0.655
109	V4826	PhiElectrostatic_GLU_180	2D	0.655
110	V4846	aa102Y	3D	0.655
111	V4950	aa137X	3D	0.655
112	V4951	aa137Y	3D	0.655
113	V4953	aa138X	3D	0.655
114	V4955	aa138Z	3D	0.655
115	V4957	aa139Y	3D	0.655
116	V4958	aa139Z	3D	0.655
117	V5015	aa158Z	3D	0.655
118	V5018	aa159Z	3D	0.655
119	V5021	aa160Z	3D	0.655
120	V5033	aa164Z	3D	0.655
121	V5052	aa171X	3D	0.655
122	V5055	aa172X	3D	0.655
123	V5056	aa172Y	3D	0.655
124	V5057	aa172Z	3D	0.655
125	V5058	aa173X	3D	0.655
126	V5059	aa173Y	3D	0.655
127	V5060	aa173Z	3D	0.655
128	V5067	aa176X	3D	0.655
129	V5070	aa177X	3D	0.655
130	V5076	aa179X	3D	0.655
131	V5120	aa193Z	3D	0.655
132	V5123	aa194Z	3D	0.655
133	V5125	aa195Y	3D	0.655
134	V5129	aa196Z	3D	0.655
135	V5130	aa197X	3D	0.655
136	V5134	aa198Y	3D	0.655
137	V5155	aa205Y	3D	0.655
138	V5156	aa205Z	3D	0.655
139	V5157	aa206X	3D	0.655
140	V5164	aa208Y	3D	0.655
141	V5183	aa214Z	3D	0.655
142	V5189	aa216Z	3D	0.655
143	V5206	aa222Y	3D	0.655
144	V5216	aa225Z	3D	0.655
145	V5218	aa226Y	3D	0.655
146	V5222	aa227Z	3D	0.655
147	V5224	aa228Y	3D	0.655
148	V5256	aa239X	3D	0.655
149	V5266	aa242Y	3D	0.655
150	V5280	aa247X	3D	0.655
151	V5292	aa251X	3D	0.655
152	V5295	aa252X	3D	0.655
153	V5338	aa266Y	3D	0.655
154	V5365	aa275Y	3D	0.655
		Optimal Number of Features :1-154
